# Supplementary material for: Validity of cachexia diagnosed using AWGC criteria in outpatients with chronic kidney disease undergoing hemodialysis: a cross-sectional study
Source: Research Square preprint supplement (doi:10.21203/rs.3.rs-7958646/v1), 2025-11-14
Supplement: Supplementary file 1 [file 68cb391560906ca2077d6a96.docx]

**Additional file 1**

Comparison between patients with cachexia diagnosed using the AWGC criteria alone and those diagnosed using the AWGC and Evans criteria

|  | AWGC criteria alone | AWGC and Evans criteria | *p*-values |
| --- | --- | --- | --- |
| N | 5 (17.9) | 23 (82.1) |  |
| EQ-5D-5L index, points | 0.832 (0.765–0.873) | 0.721 (0.613–0.786) | 0.126 |
| IADL score, points | 8.0 (8.0–8.0) | 7.0 (4.5–8.0) | 0.198 |
| Statistical analyses were performed using Mann–Whitney U tests.  AWGC: Asian Working Group for Cachexia; EQ-5D-5L: European Quality of Life 5 Dimensions 5-level ; IADL: instrumental activities of daily living | | | |
